# Supplementary material for: Attenuation of Wnt/β-catenin signaling in patients with Stevens-Johnson syndrome and toxic epidermal necrolysis
Source: PubMed Central journal article supplement (PMC6949146; doi:10.7150/ijbs.32331), 2020-01-01
Supplement: ijbsv16p0353s1.pdf [file ijbsv16p0353s1.pdf]

**Supplement Table 1. Demographic data and clinical characteristics of control groups from burn injury patients and healthy donors.**

| <b>Demographic data</b>                                 | <b>Burn injury patients<br/>(n=11)</b> | <b>Healthy donors<br/>(n=11)</b> |
|---------------------------------------------------------|----------------------------------------|----------------------------------|
| <b>Age, years, mean <math>\pm</math> SD (range)</b>     | 42.5 $\pm$ 11.4 (20-68)                | 43.5 $\pm$ 12.7 (23-67)          |
| <b>Sex ratio (M:F)</b>                                  | 4:7                                    | 5:6                              |
| <b>Skin (TBSA, %, mean <math>\pm</math> SD (range))</b> |                                        |                                  |
| Erythema                                                | 54.2 $\pm$ 31.0 (3–50)                 | -                                |
| Blister or detachment                                   | 26.6 $\pm$ 17.5 (5–90)                 | -                                |
| <b>Mortality (n, (%))</b>                               | 0                                      | -                                |
| <b>Underlying disease, n</b>                            |                                        |                                  |
| Malignancy                                              | 0                                      | 0                                |
| Chronic kidney disease                                  | 1                                      | 0                                |
| Chronic liver disorder                                  | 0                                      | 0                                |
| Diabetes                                                | 1                                      | 0                                |
| Hypertension                                            | 1                                      | 0                                |
| Gouty                                                   | 0                                      | 0                                |
| Epilepsy/Neuralgia                                      | 0                                      | 0                                |
| Rheumatoid arthritis                                    | 0                                      | 0                                |
